# Supplementary material
Source: publisher site journal article supplement (https://www.dovepress.com/article/324952)
Supplement: Supplementary file 1 [file get_supplementary_file.php]

**Supporting information**

**Figure S1 Pulmonary functions of emphysema mice treated with hADSCs.**

**Notes:** FVC (**A**), FEV0.1/FVC (**B**), Cst (**C**), FEF0.1 (**D**), PEF (**E**), Rn (**F**), G (**G**), H (**H**), IC (**I**), and Rrs (**J**) were measured using the flexiVent® ventilation system. Control group (n=5), hADSC group (n=3), Elastase group (n=7), and Elastase-hADSC group (n=10). Values are means ± SEM. *P < 0.05, **P < 0.01.

**Abbreviations:** Cst, static compliance; FEF0.1, forced expiratory flow at 0.1 s; FEV0.1, forced expiratory volume at 0.1 s; FEV1, forced expiratory volume in one second; FVC, forced vital capacity; G, tissue damping; H, tissue elastance; IC, inspiratory capacity; PEF, peak expiratory flow; Rn, newtonian resistance; Rrs, respiratory system resistance.

**Figure S2 & S3 Fluorescence staining of epithelial markers in the lungs.**

**Notes:** Lung sections from SCID-beige mice administered intravenously with PKH26-labeled hADSCs were observed under a confocal laser microscope. Expression of epithelial cell markers TTF-1, Pro SP-C, β-Catenin, and CDH1 was visualized by Alexa Fluor 488 (green) in PKH26-labeled hADSCs (red) (×400). Arrow shows Alexa Flour 488 and PKH-26 merged cells. Scale bar shows 50 μm. Each figure is from representative data of different mice from Figure 4.

**Abbreviations:** hADSCs, human adipose-derived mesenchymal stem cells; DAPI, 4',6-diamidino-2-phenylindole; TTF-1, Thyroid transcription factor-1; SP-C, Surfactant protein C; CDH1, Cadherin-1.
